# Supplementary material
Source: Springer Nature journal article supplement (https://www.springermedizin.de/resource/supplementary/12902_2012_155_MOESM2_ESM.pdf/9515600)

**a** % of dLVDD,dALP,dLST, piecewise linear regression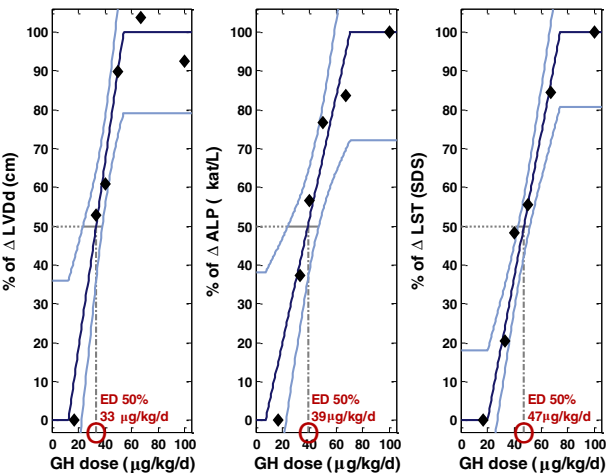**b** dLVDD,dALP,dLST, piecewise linear regression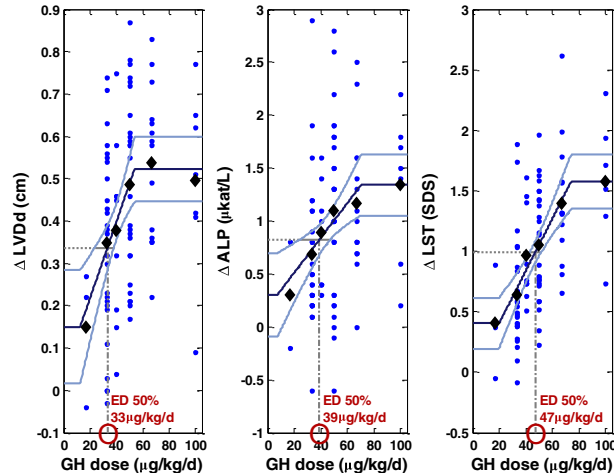**a** % of dInsulin,dHeight,dIGF-I, piecewise linear regression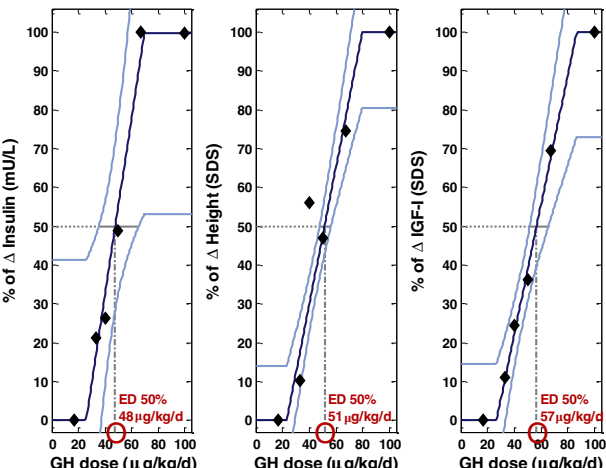**b** dInsulin,dHeight,dIGF-I, piecewise linear regression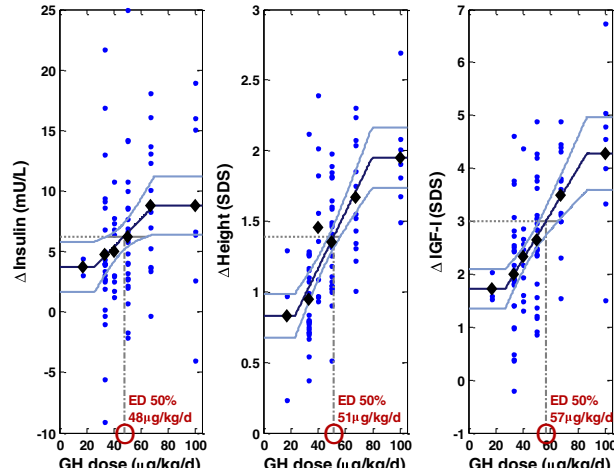

Supplement: MOESM2 [file 9515600]
